# Supplementary material for: Modulation of Drosophila post-feeding physiology and behavior by the neuropeptide leucokinin
Source: PubMed Central journal article supplement (PMC6245514; doi:10.1371/journal.pgen.1007767), 2018-11-20
Supplement: pgen.1007767.s002.pdf [file pgen.1007767.s002.pdf]

**Supplementary Table 1:** p-values for the proboscis extension reflex data in Figure 5. p-values below 0.05 have been highlighted in grey. Wilcoxon Rank-Sum was used for comparison between two genotypes, while Kruskal-Wallis with Steel-Dwass post-hoc test was used for two or more genotypes. These tests were performed at each concentration independently.

|                                       | 0.1mM  | 1mM      | 10mM     | 100mM    |
|---------------------------------------|--------|----------|----------|----------|
| <b>Figure 5A</b>                      |        |          |          |          |
| <i>w1118 vs Lk+/-</i>                 | 0.4716 | 0.4609   | 0.1857   | < 0.0001 |
| <i>w1118 vs Lk-/-</i>                 | 0.9719 | 0.2162   | 0.0203   | < 0.0001 |
| <i>Lk+/- vs Lk-/-</i>                 | 0.5125 | 0.0941   | 0.6813   | 0.5880   |
|                                       |        |          |          |          |
| <b>Figure 5B</b>                      |        |          |          |          |
| <i>w1118 vs Lk-/-</i>                 | 0.1370 | 0.0649   | < 0.0001 | < 0.0001 |
| <i>UAS-Lk; Lk-/- vs Lk-/-</i>         | 0.5713 | 0.5025   | 0.0113   | 0.0027   |
| <i>w1118 vs UAS-Lk; Lk-/-</i>         | 0.9181 | 0.8094   | 0.9483   | 0.0045   |
|                                       |        |          |          |          |
| <b>Figure 5C</b>                      |        |          |          |          |
| <i>Lk &gt; TNT vs Lk &gt; IMP TNT</i> | 0.0608 | 0.0549   | 0.0120   | 0.0295   |
|                                       |        |          |          |          |
| <b>Figure 5D</b>                      |        |          |          |          |
| <i>w1118 vs UAS-Lkr; Lkr-/-</i>       | 0.7218 | 0.9641   | 0.7593   | 0.4060   |
| <i>w1118 vs Lkr+/-</i>                | 0.7780 | 0.8045   | 0.9101   | 0.3203   |
| <i>UAS-Lkr; Lkr-/- vs Lkr+/-</i>      | 0.9871 | 0.7140   | 0.6810   | 0.0523   |
| <i>UAS-Lkr; Lkr-/- vs Lkr-/-</i>      | 0.1947 | 0.0093   | 0.0026   | < 0.0001 |
| <i>Lkr+/- vs Lkr-/-</i>               | 0.0884 | 0.0040   | 0.0079   | 0.0966   |
| <i>w1118 vs Lkr-/-</i>                | 0.1349 | < 0.0001 | < 0.0001 | 0.0008   |
