# Supplementary material for: Modulation of Drosophila post-feeding physiology and behavior by the neuropeptide leucokinin
Source: PubMed Central journal article supplement (PMC6245514; doi:10.1371/journal.pgen.1007767), 2018-11-20
Supplement: pgen.1007767.s003.pdf [file pgen.1007767.s003.pdf]

| Assay                      | Genotype                                                                                                | Phenotype                                                                                        | Reference                              |
|----------------------------|---------------------------------------------------------------------------------------------------------|--------------------------------------------------------------------------------------------------|----------------------------------------|
| Starvation resistance      | Lk and Lkr mutants<br>Lk > Lk RNAi<br>DILP2 > Lkr RNAi                                                  | Increased survival<br>Increased survival<br>Increased survival <sup>a</sup>                      | This study<br>[1]<br>This study        |
| Desiccation resistance     | Lk and Lkr mutants<br>Lk > Lk RNAi<br>Lk > TrpA1<br>Lk; Gal80 <sup>ts</sup> > Ork                       | Increased survival<br>Increased survival<br>Decreased survival<br>Increased survival             | This study<br>[1]<br>[2]<br>[2]        |
| Water content              | Lk and Lkr mutants<br>Lk > Lk RNAi                                                                      | Increased<br>Increased                                                                           | This study<br>[1]                      |
| Proboscis extension reflex | Lk mutant<br>Lk > TNT<br>Lkr mutant                                                                     | Decreased<br>Decreased<br>Increased                                                              | This study<br>This study<br>This study |
| Blue dye feeding           | Lk and Lkr mutants                                                                                      | No effect                                                                                        | This study                             |
| CAFE assay                 | Lk and Lkr mutants<br>Lk > TrpA1<br>Lk; Gal80 <sup>ts</sup> > Ork<br>Lk > Lk RNAi<br>Lk and Lkr mutants | Decreased<br>Decreased<br>Decreased<br>No effect<br>Up to 48h: increased<br>After 48h: decreased | This study<br>[2]<br>[2]<br>[1]<br>[3] |
| Negative geotaxis          | Lk and Lkr mutants                                                                                      | No effect                                                                                        | This study                             |
| Locomotor activity         | Lk and Lkr mutants<br>Lk > Shi <sup>ts</sup><br>Lk > Kir2.1                                             | Decreased<br>No effect<br>Decreased                                                              | This study<br>[4]<br>[4]               |
| Metabolic rate             | Lk and Lkr mutants                                                                                      | Decreased                                                                                        | This study                             |
| DILP2 peptide levels       | Lk mutant<br>Lkr mutant                                                                                 | No effect<br>Increased                                                                           | This study<br>This study               |
| DILP3 peptide levels       | Lk and Lkr mutants                                                                                      | Increased                                                                                        | This study                             |
| DILP5 peptide levels       | Lk and Lkr mutants                                                                                      | No effect                                                                                        | This study                             |
| <i>DILP2</i> transcript    | DILP2 > Lkr RNAi                                                                                        | No effect                                                                                        | This study                             |
| <i>DILP3</i> transcript    | DILP2 > Lkr RNAi                                                                                        | Increased <sup>b</sup>                                                                           | This study                             |
| <i>DILP5</i> transcript    | DILP2 > Lkr RNAi                                                                                        | Decreased <sup>c</sup>                                                                           | This study                             |

<sup>a</sup> Increased starvation survival observed for flies maintained as adults on normal, and high sugar and high protein diet only.

<sup>b</sup> *DILP3* transcript is upregulated in flies maintained as adults on normal, and high sugar and high protein diet only.

<sup>c</sup> *DILP5* transcript is down regulated in flies maintained as adults on normal diet.

1. Zandawala M, Marley R, Davies SA, Nässel DR. Characterization of a set of abdominal neuroendocrine cells that regulate stress physiology using colocalized diuretic peptides in *Drosophila*. Cell Mol Life Sci. 2018;75:1099–115. doi: 10.1007/s00018-017-2682-y. PubMed PMID: 29043393.
2. Liu Y, Luo J, Carlsson MA, Nässel DR. Serotonin and insulin-like peptides modulate leucokinin-producing neurons that affect feeding and water homeostasis in *Drosophila*. J Comp Neurol. 2015;523(12):1840-63. Epub 2015/03/04. doi: 10.1002/cne.23768. PubMed PMID: 25732325.
3. Al-Anzi B, Armand E, Nagamei P, Olszewski M, Sapin V, Waters C, et al. The leucokinin pathway and its neurons regulate meal size in *Drosophila*. Curr Biol. 2010;20(11):969-78. Epub 2010/05/25. doi: S0960-9822(10)00517-8 [pii]10.1016/j.cub.2010.04.039. PubMed PMID: 20493701; PubMed Central PMCID: PMC2896026.
4. Cavey M, Collins B, Bertet C, Blau J. Circadian rhythms in neuronal activity propagate through output circuits. Nat Neurosci. 2016;19(4):587-95. doi: 10.1038/nn.4263. PubMed PMID: WOS:000372909800016.
